# Supplementary material for: Improvement and Validation of a Genomic DNA Extraction Method for Human Breastmilk
Source: MDPI journal article supplement (doi:10.3390/mps6020034), 2023-03-26
Supplement: s1 [file s1]

## Supporting information

Supplementary Table S1

**Table S1** Strains and cultivation conditions used in this study

| ID                      | Strain                                 | Gram-stain | Genome size (Mbp) | plasmid (kbp) | Atmosphere <sup>a</sup> | Medium <sup>b</sup> | Reference |
|-------------------------|----------------------------------------|------------|-------------------|---------------|-------------------------|---------------------|-----------|
| <i>Bacteria strains</i> |                                        |            |                   |               |                         |                     |           |
| 1                       | <i>Lactobacillus plantarum</i>         | +          | 3.20              | 0             | Anaerobic               | MRS:Agar and broth  | [54]      |
| 2                       | <i>Lactobacillus fermentum</i>         | +          | 1.90              | 32.6          | Anaerobic               | MRS:Agar and broth  | [55]      |
| 3                       | <i>Staphylococcus aureus</i>           | +          | 2.80              | 0             | Aerobic                 | LB: Agar and broth  | [56]      |
| 6                       | <i>Bordetella bronchiseptica</i>       | -          | 5.20              | 0             | Aerobic                 | LB: Agar and broth  | [57]      |
| 7                       | <i>Citrobacter freundii</i>            | -          | 4.96              | 0             | Aerobic                 | LB: Agar and broth  | [58]      |
| 8                       | <i>Bacillus cereus</i>                 | +          | 5.50              | 208           | Aerobic                 | LB: Agar and broth  | [59]      |
| 9                       | <i>Staphylococcus hominis</i>          | +          | 2.34              | 0             | Aerobic                 | LB: Agar and broth  | [60]      |
| 10                      | <i>Salmonella typhimurium</i>          | -          | 5.10              | 265           | Aerobic                 | LB: Agar and broth  | [61]      |
| 11                      | <i>Providencia stuartii</i>            | -          | 4.42              | 0             | Aerobic                 | LB: Agar and broth  | [62]      |
| 12                      | <i>Staphylococcus epidermis</i>        | +          | 2.45              | 15.14         | Aerobic                 | LB: Agar and broth  | [63]      |
| 13                      | <i>Micrococcus sp. KBS0714</i>         | +          | 2.42              | 0             | Aerobic                 | LB: Agar and broth  | [64]      |
| 14                      | <i>Staphylococcus aureus</i> ATCC 6538 | +          | 2.82              | 28            | Aerobic                 | LB: Agar and broth  | [65]      |

|                      |                                    |    |         |        |         |                    |                |
|----------------------|------------------------------------|----|---------|--------|---------|--------------------|----------------|
| 15                   | <i>Enterobacter cloacae</i>        | -  | 4.78    | 208.74 | Aerobic | LB: Agar and broth | [66]           |
| 16                   | <i>Escherichia coli</i> ATCC 8739  | -  | 5.40    | 0      | Aerobic | LB: Agar and broth | [67]           |
| 17                   | <i>Staphylococcus haemolyticus</i> | +  | 2.63    | 41.6   | Aerobic | LB: Agar and broth | [68]           |
| 18                   | <i>Morganella morganii</i>         | -  | 3.86    | 0      | Aerobic | LB: Agar and broth | [69]           |
| 19                   | <i>Proteus mirabilis</i>           | -  | 4.01    | 102    | Aerobic | LB: Agar and broth | [70]           |
| 20                   | <i>Klebsiella pneumoniae</i>       | -  | 5.59    | 180    | Aerobic | LB: Agar and broth | [71]           |
| 21                   | <i>Serratia marcescens</i> RSC-14  | -  | 5.12    | 0      | Aerobic | LB: Agar and broth | [72]           |
| <b>Yeast strains</b> |                                    |    |         |        |         |                    |                |
| 22                   | <i>Naganishia</i> sp (HMI)         | NA | Unknown | NA     | Aerobic | PDA                | In preparation |
| 23                   | <i>Candida albicans</i>            | NA | 14.69   | NA     | Aerobic | PDA                | [73]           |
| 24                   | <i>Candida tropicalis</i>          | NA | 15.3    | NA     | Aerobic | PDA                | [74]           |
| 25                   | <i>Rhodotorula</i>                 | NA | 18.6    | NA     | Aerobic | PDA                | [75]           |

<sup>a</sup>Anaerobic strains were cultivated in GasPak anaerobic chamber (Becton Dickinson, Franklin Lakes, NJ) with Pack-Anaero sachet (MGC Inc., NY, NY, USA).

<sup>b</sup>Medium: LB, Luria-Bertani (LB agar: 10 g NaCl, 10 g tryptone, 5 g yeast extract per liter, pH 7.2. Add 1.5% agar. Sterilize by autoclaving.); MRS, De Man, Rogosa and Sharpe (Oxoid, Basingstoke, HA, UK); PDA, potato dextrose agar.

HMI, Human milk isolated; NA, not apply;

Supplementary Table S2

**Table S2** Summary of DNA extraction methods used in this study

| Method name                                             | Code         | Basis and format                                                             | Starting material                                   | Cell lysis                                                                                                                                           | Removal of contaminants                                                                                                                       | DNA precipitation                                                                                    | Elution buffer                      | Reference                                 |
|---------------------------------------------------------|--------------|------------------------------------------------------------------------------|-----------------------------------------------------|------------------------------------------------------------------------------------------------------------------------------------------------------|-----------------------------------------------------------------------------------------------------------------------------------------------|------------------------------------------------------------------------------------------------------|-------------------------------------|-------------------------------------------|
| Quick-DNA™<br>Fecal/Soil Microbe<br>Kit                 | ZYMO         | Solid-based;<br>Silica based<br>and<br>ZymoSpin™<br>Technology               | Cell pellet<br>from 5 mL of<br>mature<br>human milk | ZR<br>BashingBead<br>™ in a Lysis<br>solution                                                                                                        | Silica matrix                                                                                                                                 | ZymoSpin™<br>Technology                                                                              | 20 µL DNA<br>Elution<br>Buffer      | (Zymo<br>Research,<br>Tustin, CA,<br>USA) |
| Guanidinium<br>thiocyanate                              | GTC          | Solution-<br>based;<br>Guanidinium<br>thiocyanate                            | Cell pellet<br>from 5 mL of<br>mature<br>human milk | Bead-Beating<br>method with<br>a lysis buffer<br>(4M<br>guanidine<br>thiocyanate,<br>Tris 0.1M, pH<br>7.5 y 600 µL<br>of N-<br>Lauroylsarcos<br>ine) | TENP (Tris 50<br>Mm, pH 8, EDTA<br>20 Mm, pH 8;<br>NaCl 100 Mm, 1%<br>polyvinylpyrrolido<br>ne)                                               | 1/10th volume<br>of sodium<br>acetate from<br>3M pH5.2 and<br>2.5-3 vols ice<br>cold<br>100% Ethanol | 40 µL sterile<br>deionized<br>water | Modify<br>from<br>[76]                    |
| Cetyltrimethylamo<br>nium bromide<br>double phenol step | CTAB-<br>2PH | Solution-base<br>d; selective<br>precipitation<br>of DNA with<br>CTAB (10%). | Cell pellet<br>from 5 mL of<br>mature<br>human milk | Chemical and<br>enzymatic<br>lysis with<br>SDS 10% and<br>lysozyme<br>(100 mg/mL)                                                                    | Washing with<br>organic solvents,<br>two strong<br>(phenol:chloroform:isoamyl<br>alcohol), and one<br>weak<br>(chloroform:isoamyl<br>alcohol) | Ice cold 0.6<br>volume of<br>isopropanol                                                             | 40 µL sterile<br>deionized<br>water | Modified<br>from<br>[33]                  |

|                                                            |          |                                                                 |                                            |                                                                                                                          |                                                                                                                          |                            |                                                               |            |
|------------------------------------------------------------|----------|-----------------------------------------------------------------|--------------------------------------------|--------------------------------------------------------------------------------------------------------------------------|--------------------------------------------------------------------------------------------------------------------------|----------------------------|---------------------------------------------------------------|------------|
| Cetyltrimethylammonium bromide standardized for human milk | CTAB-STD | Solution-based; selective precipitation of DNA with CTAB (10%). | Cell pellet from 5 mL of mature human milk | Mechanical lysis using liquid nitrogen (N <sub>2</sub> +). Chemical lysis with SDS 10% coupled with lysozyme (100 mg/mL) | Washing with organic solvents, one strong (phenol:chloroform:isoamyl alcohol), and two weak (chloroform:isoamyl alcohol) | Ice cold Isopropanol (v/v) | 40 µL TE buffer (10 mM Tris hydrochloride, 1 mM EDTA, pH 8.0) | This study |
|------------------------------------------------------------|----------|-----------------------------------------------------------------|--------------------------------------------|--------------------------------------------------------------------------------------------------------------------------|--------------------------------------------------------------------------------------------------------------------------|----------------------------|---------------------------------------------------------------|------------|

mg, milligrams; mL, milliliters; mM, milliMolar, v/v, volumen/volumen; µL, microliters;

### Supplementary Table S3

**Table S3** DNA Quality based on electrophoresis of genomic DNA

| Electrophoretic characteristics                | Electrophoretic Integrity | Indicator description                                                                                          | Assigned score |
|------------------------------------------------|---------------------------|----------------------------------------------------------------------------------------------------------------|----------------|
| DNA quality must be assessed in 1% agarose gel | High integrity            | Well defined line at the top of the gel (Discrete band)                                                        | 3              |
|                                                | Adequate integrity        | Simultaneous presence of a partially discrete band at the top with slight smearing                             | 2              |
|                                                | Partially degraded        | No discrete band and the presence of a concentrated smear at the top and along the entire electrophoretic run. | 1              |
|                                                | Fully degraded            | No band, smear is concentrated at the bottom or not observed                                                   | 0              |

Adapted from "Programa de control de calidad de ácidos nucleicos. Carlos III National DNA Bank (University of Salamanca). [www.bancoadn.org](http://www.bancoadn.org)"
